# Supplementary material
Source: PubMed Central journal article supplement (PMC4577246)
Supplement: NIHMS469289-supplement-Supp_Table_1.pdf [file NIHMS469289-supplement-Supp_Table_1.pdf]

**Relationship between membrane Par3 and tumor characteristics**

| Characteristic                  | Total (N=98) | Mean membrane Par3 TS <sup>§</sup> | P value <sup>¶</sup> |
|---------------------------------|--------------|------------------------------------|----------------------|
| <b>Tumor Histological Grade</b> |              |                                    |                      |
| Grade 1                         | 36           | 6.08 ± 1.40                        |                      |
| Grade 2                         | 42           | 5.83 ± 1.58                        |                      |
| Grade 3                         | 20           | 4.94 ± 2.14                        |                      |
| Grade 1 vs. Grade 3.            |              |                                    | 0.0202*              |
| <b>ER status</b>                |              |                                    |                      |
| ER-pos                          | 70           | 5.96 ± 1.52                        |                      |
| ER-neg                          | 28           | 5.21 ± 1.97                        |                      |
| ER-pos vs. ER-neg               |              |                                    | 0.0478*              |
| <b>HER2 status</b>              |              |                                    |                      |
| HER2-neg (0/1+)                 | 86           | 5.86 ± 1.6                         |                      |
| HER2-pos (2+/3+)                | 12           | 4.92 ± 2.11                        |                      |
| HER2-pos (3+)                   | 9            | 4.33 ± 2.12                        |                      |
| HER2-neg vs. HER2-pos (2+/3+)   |              |                                    | 0.0734               |
| HER2-neg vs. HER2-pos (3+)      |              |                                    | 0.0096**             |

<sup>§</sup> Plus-minus values are mean±SD.

<sup>¶</sup> Two-tailed t test

Significance level \*<0.05, \*\*<0.01
