# Supplementary material
Source: PubMed Central journal article supplement (PMC4577246)
Supplement: NIHMS469289-supplement-Supp_Table_2.pdf [file NIHMS469289-supplement-Supp_Table_2.pdf]

| <b>Antibody</b>         | <b>Company</b>       | <b>Catalog number</b>         |
|-------------------------|----------------------|-------------------------------|
| Akt                     | Cell Signaling       | #9272                         |
| E-cadherin              | BD Transduction Labs | 610181                        |
| Erk2                    | BD Transduction Labs | 610104                        |
| Flag M2                 | Sigma-Aldrich        | F3165                         |
| Ki67                    | Invitrogen           | 180191Z                       |
| Myc-tag                 | Cell Signaling       | #2276 Clone 9B11              |
| p34/ARPC2               | Millipore            | 07-227                        |
| Par3                    | Millipore            | 07-330                        |
| phospho-Akt (Ser473)    | Cell Signaling       | #9271                         |
| phospho-p42/44 MAPK     | Cell Signaling       | #9101                         |
| phospho-p90RSK (Ser380) | Cell Signaling       | #9341                         |
| Rac1                    | BD Transduction Labs | 610651                        |
| Tiam1                   | Cell Biolabs, Inc.   | STA-422 (included in the kit) |
| $\alpha$ -tubulin       | Sigma-Aldrich        | T9026 Clone DM 1A             |
| $\beta$ -actin          | Sigma-Aldrich        | A2228                         |

| <b>Dilutions</b>   |
|--------------------|
| WB 1:1000          |
| WB 1:2000 IF 1:200 |
| WB 1:1000          |
| WB 1:2000          |
| IF 1:50            |
| WB 1:1000          |
| WB 1:1000 IF 1:100 |
| WB 1:1000 IF 1:100 |
| WB 1:1000          |
| WB 1:2000          |
| WB 1:5000          |
