# Supplementary material
Source: PubMed Central journal article supplement (PMC4577246)

**Figure S1**

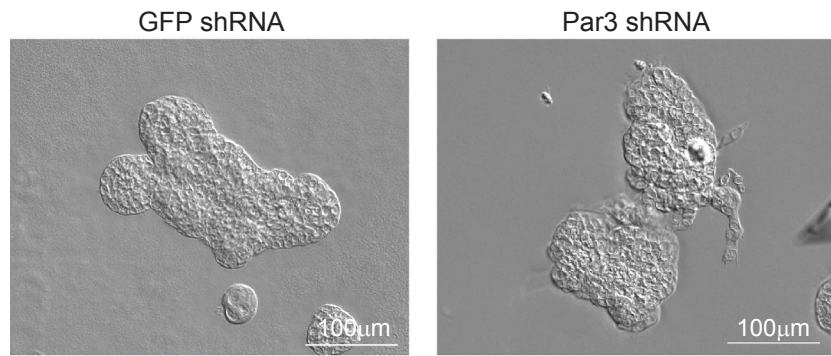

Supplement: NIHMS469289-supplement-Figure_S1.pdf [file NIHMS469289-supplement-Figure_S1.pdf]

Figure S2

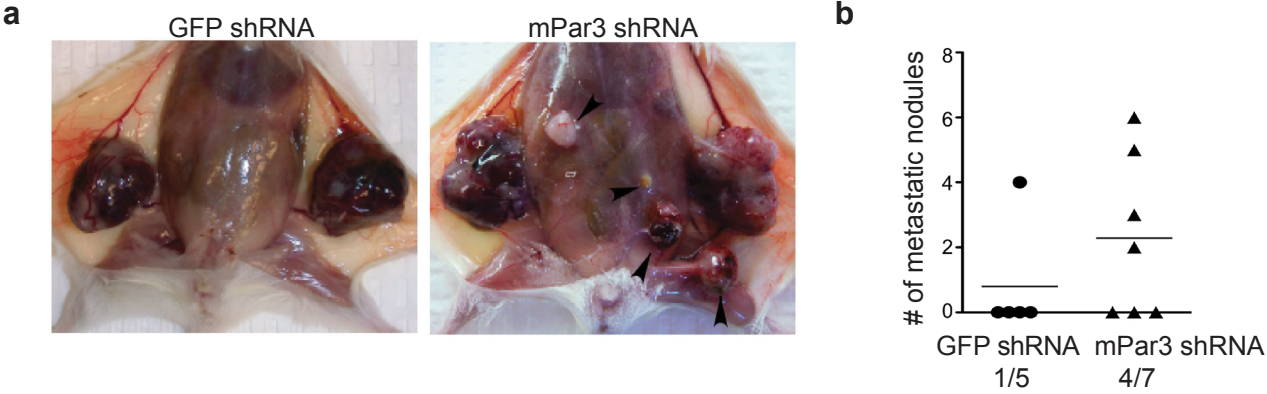

Supplement: NIHMS469289-supplement-Figure_S2.pdf [file NIHMS469289-supplement-Figure_S2.pdf]

**Figure S3**

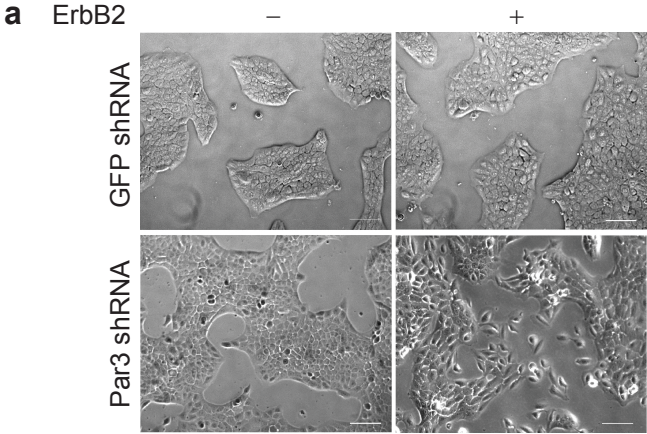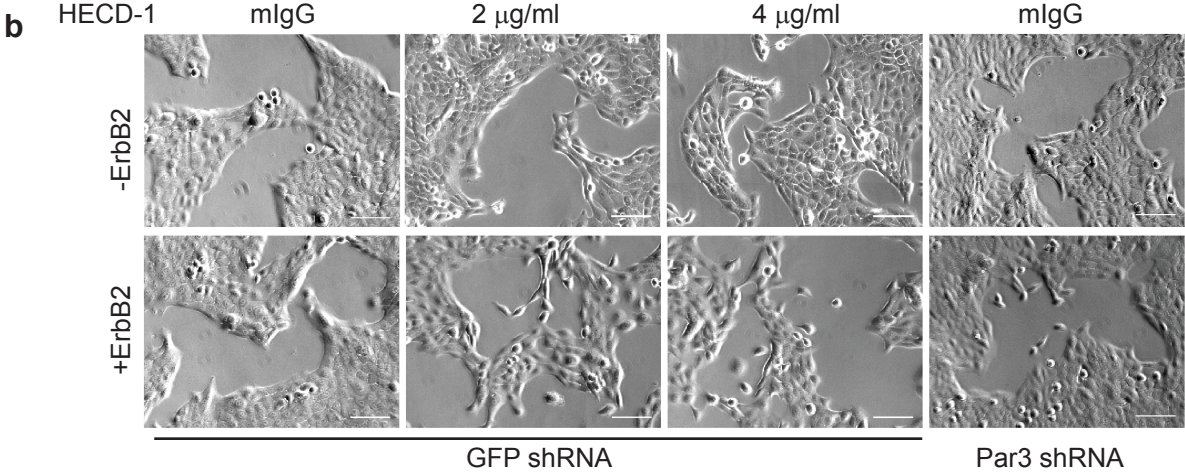

Supplement: NIHMS469289-supplement-Figure_S3.pdf [file NIHMS469289-supplement-Figure_S3.pdf]

**Figure S4**

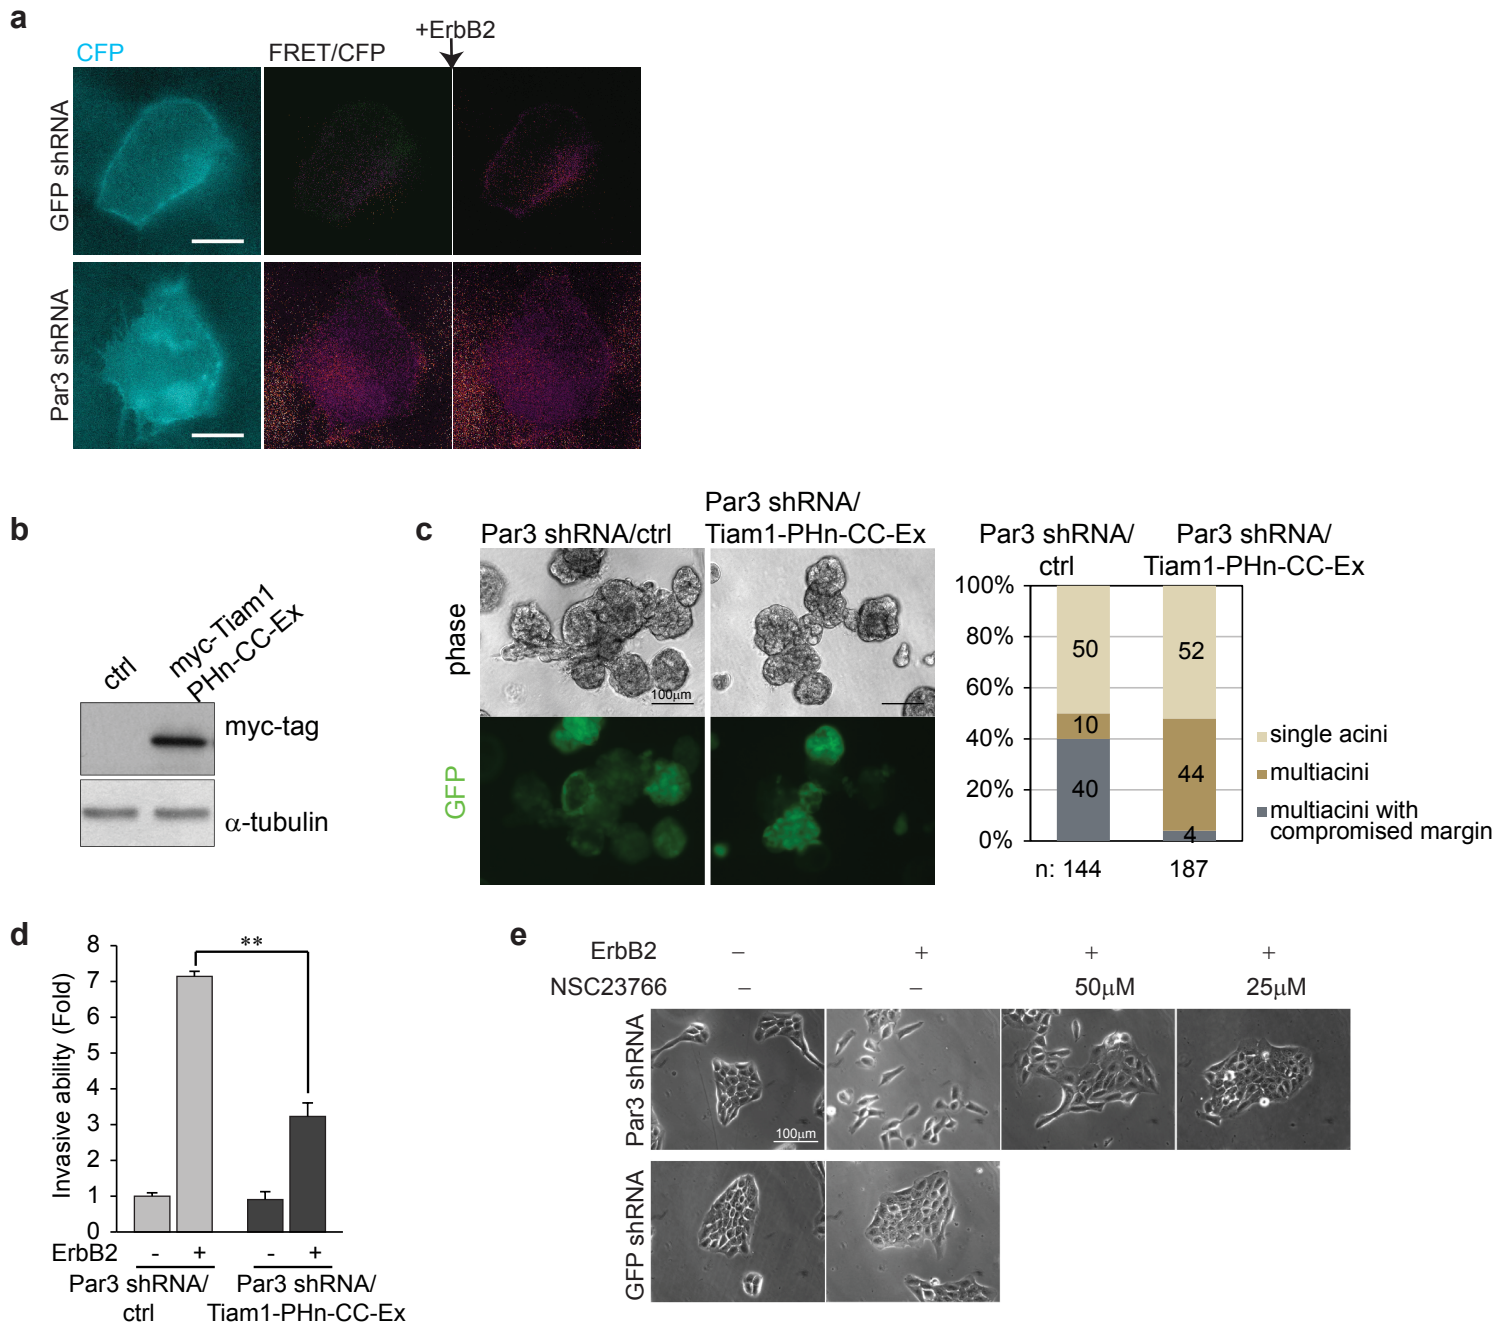

Supplement: NIHMS469289-supplement-Figure_S4.pdf [file NIHMS469289-supplement-Figure_S4.pdf]

**Figure S5**

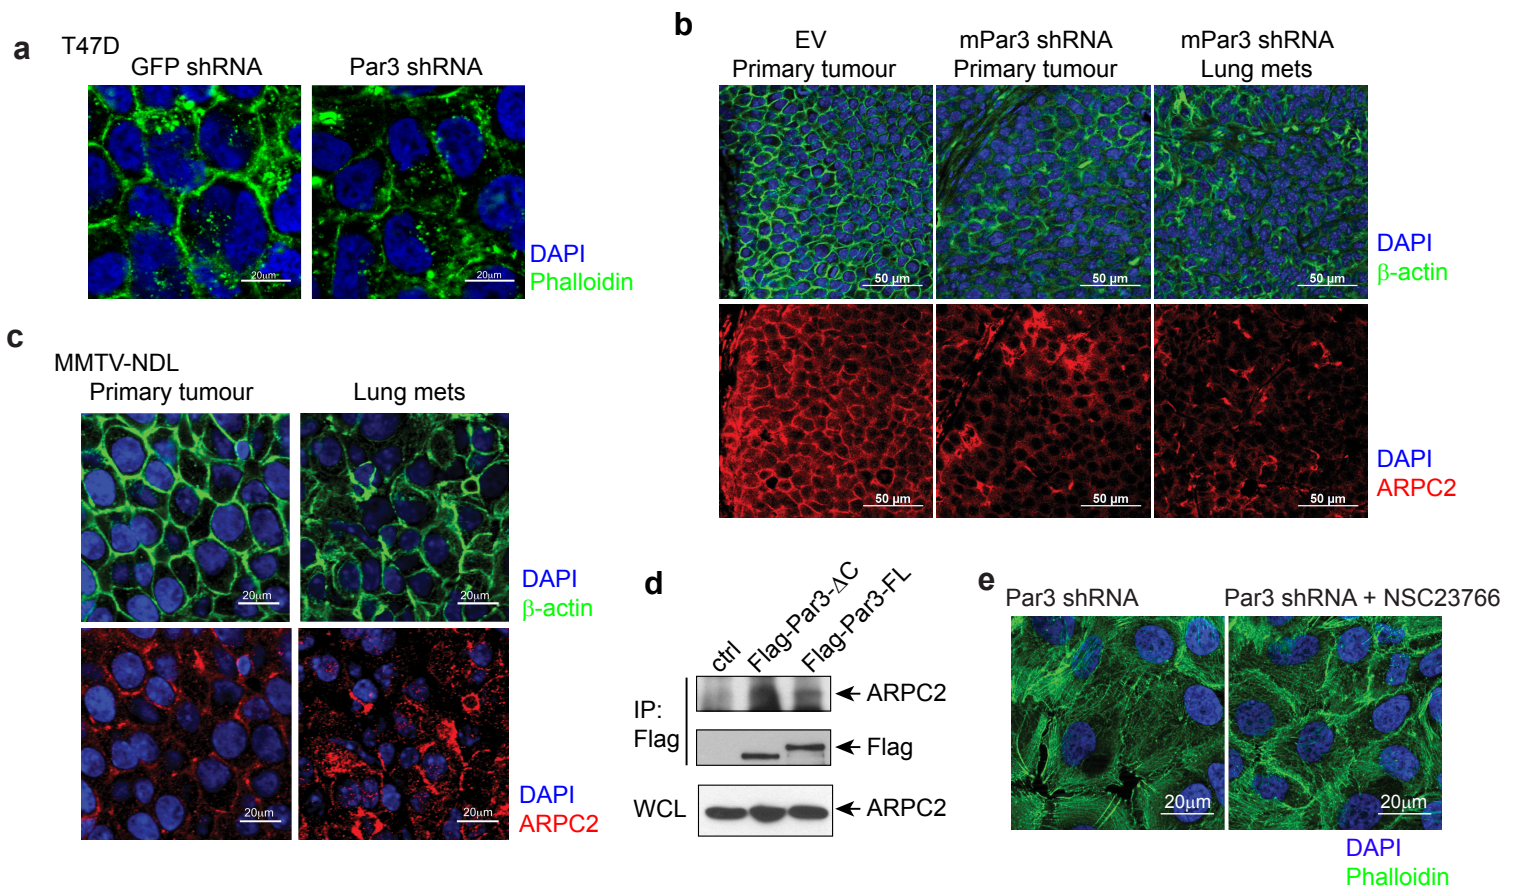

Supplement: NIHMS469289-supplement-Figure_S5.pdf [file NIHMS469289-supplement-Figure_S5.pdf]

Figure S6

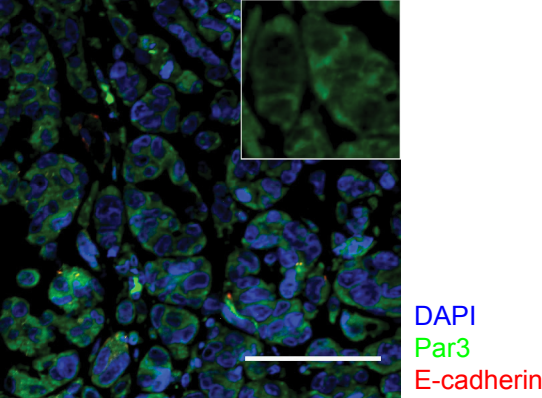

Supplement: NIHMS469289-supplement-Figure_S6.pdf [file NIHMS469289-supplement-Figure_S6.pdf]

Figure S7

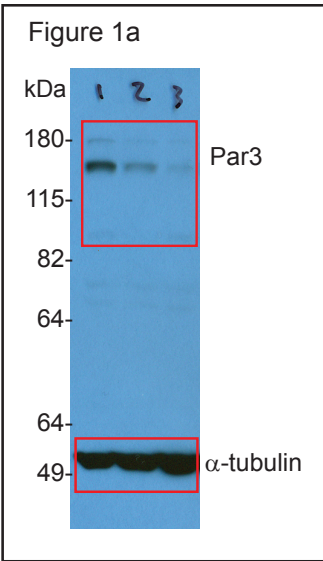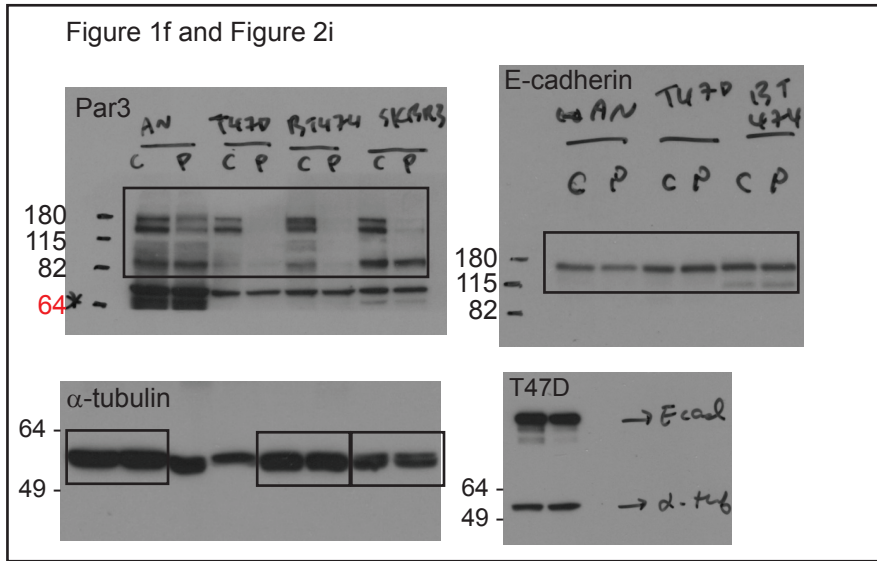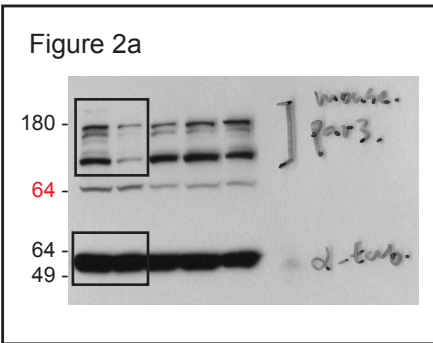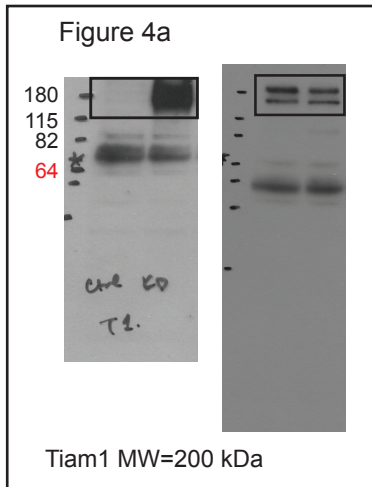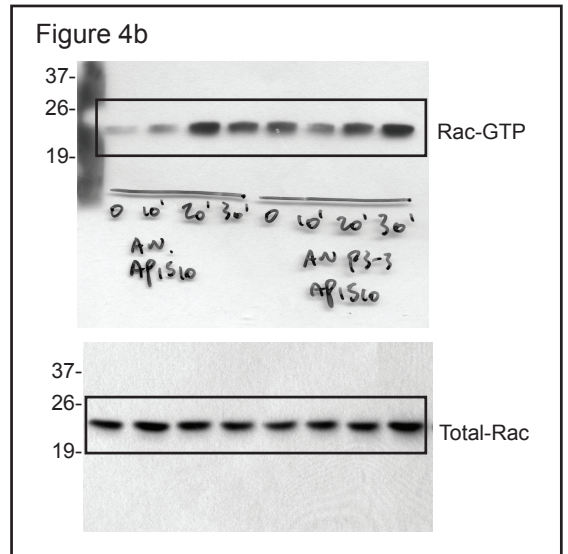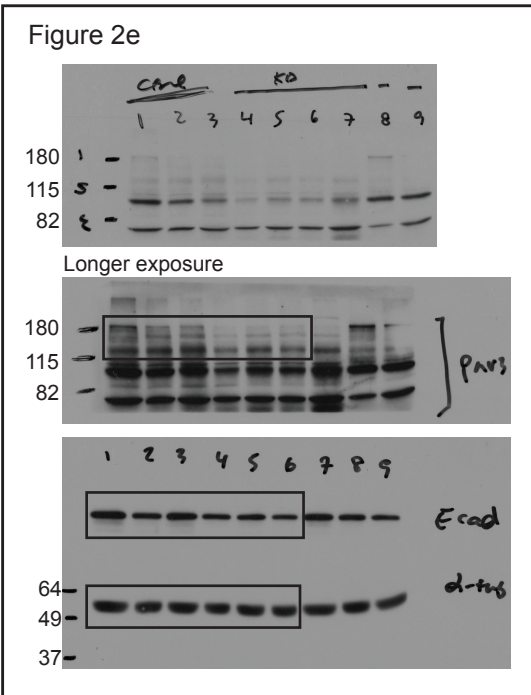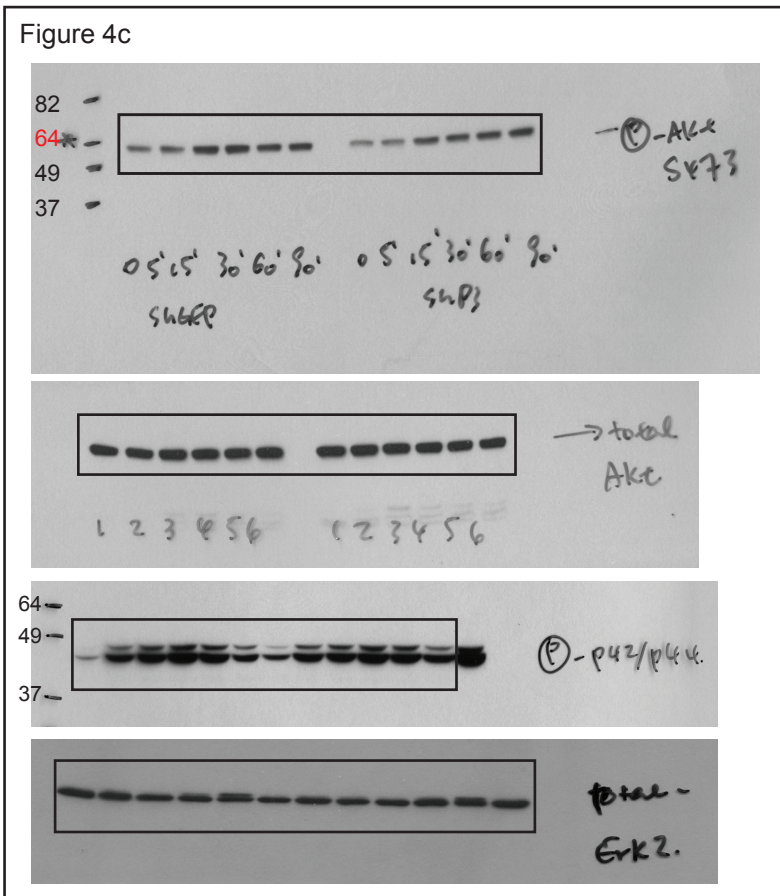

Figure 5a

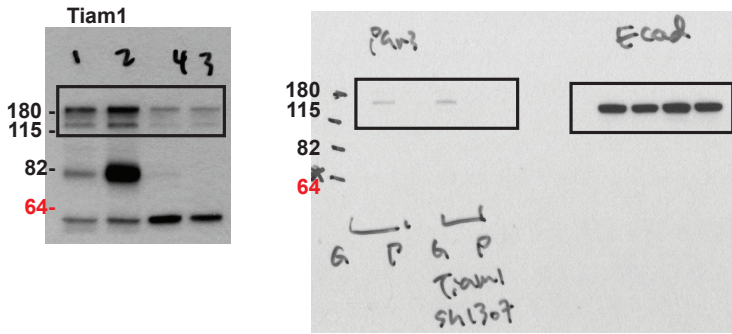

Figure 5c

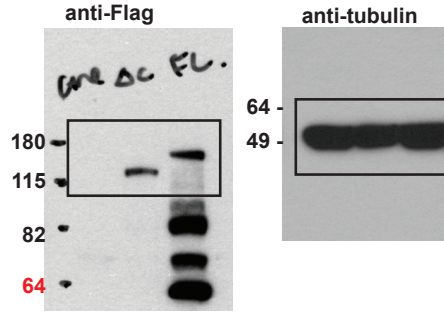

Figure 5d

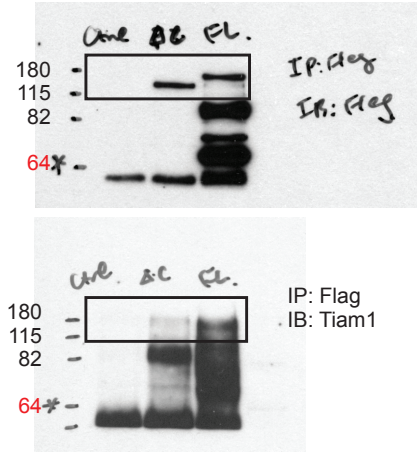

Figure 5f

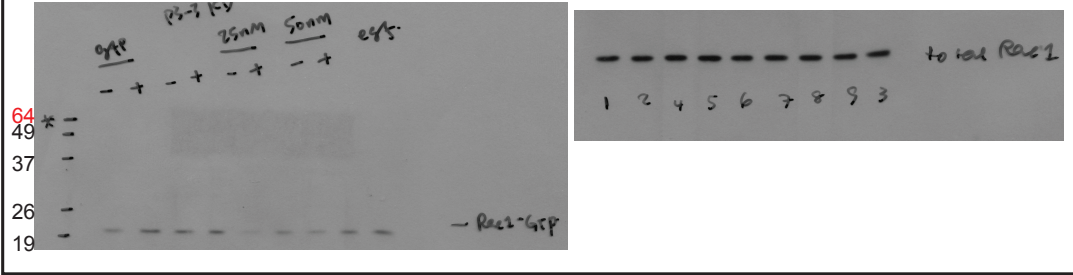

Figure 5i

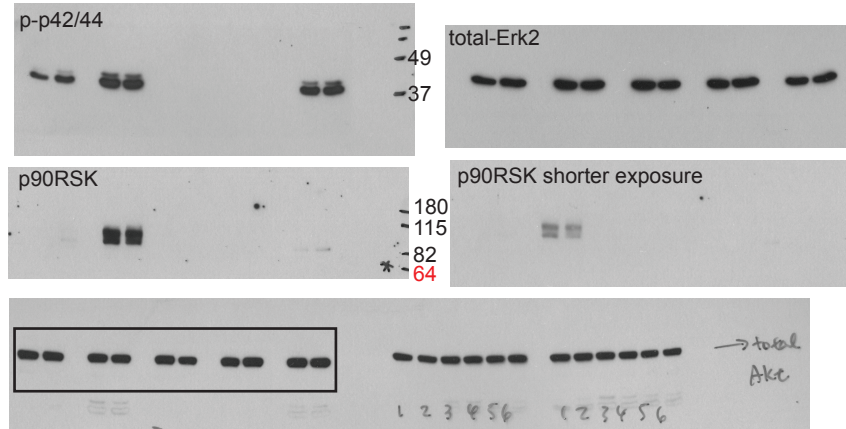

Figure 6e

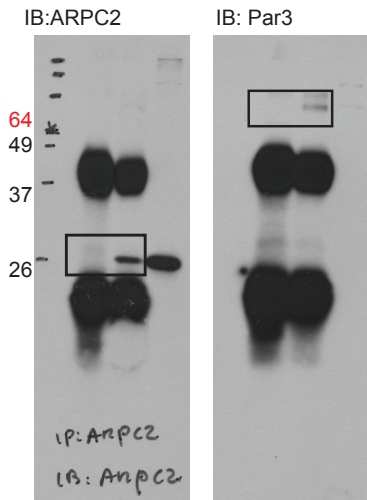

Figure 6f

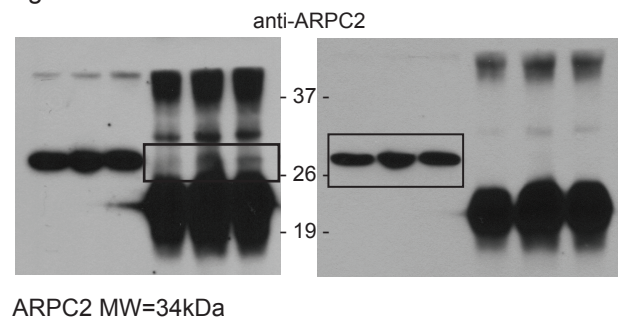

Figure S4a

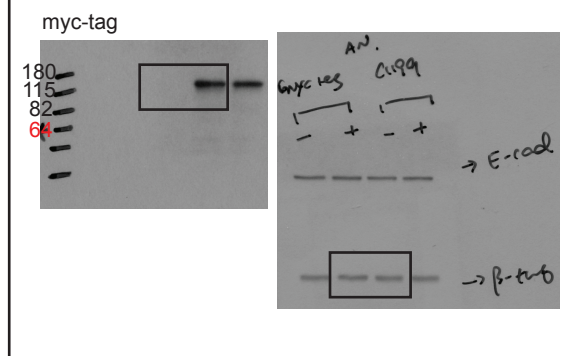

Supplement: NIHMS469289-supplement-Figure_S7.pdf [file NIHMS469289-supplement-Figure_S7.pdf]
